# Supplementary material for: Expression of extraocular opsin genes and light-dependent basal activity of blind cavefish
Source: PeerJ. 2019 Dec 17;7:e8148. doi: 10.7717/peerj.8148 (PMC6924323; doi:10.7717/peerj.8148)
Supplement: Supplemental Information 2 — The expression of 25 genes whose expression level was standardized by the expression of three housekeeping genes b2m, eef2a.1 and rps18. Cf: cavefish, Sf: surface fish, tel: telencephalon. [file peerj-07-8148-s002.xlsx]

## Sheet: Simon_opsinExpression
Target	Sample	relative Expression	Population	Tissue	Gene
rhod	Sf eye	838.006	0	0	0
rhod	Sf eye	850.891	0	0	0
rhod	Sf pineal	0.35725	0	1	0
rhod	Sf pineal	0	0	1	0
rhod	Sf tectum	0	0	2	0
rhod	Sf tectum	0	0	2	0
rhod	Sf tel	0.279949	0	3	0
rhod	Sf tel	0	0	3	0
rhod	Sf deep brain	0.320373	0	4	0
rhod	Sf deep brain	0	0	4	0
rhod	Cf eye	0	1	0	0
rhod	Cf eye	0	1	0	0
rhod	Cf pineal	0.0317788	1	1	0
rhod	Cf pineal	0	1	1	0
rhod	Cf tectum	0.350859	1	2	0
rhod	Cf tectum	0	1	2	0
rhod	Cf tel	0	1	3	0
rhod	Cf tel	0	1	3	0
rhod	Cf deep brain	0	1	4	0
rhod	Cf deep brain	0	1	4	0
sws2	Sf eye	347.925	0	0	1
sws2	Sf eye	376.617	0	0	1
sws2	Sf pineal	2.60784	0	1	1
sws2	Sf pineal	2.92229	0	1	1
sws2	Sf tectum	4.02374	0	2	1
sws2	Sf tectum	4.29451	0	2	1
sws2	Sf tel	2.81434	0	3	1
sws2	Sf tel	3.39988	0	3	1
sws2	Sf deep brain	5.42574	0	4	1
sws2	Sf deep brain	8.67314	0	4	1
sws2	Cf eye	0	1	0	1
sws2	Cf eye	0	1	0	1
sws2	Cf pineal	0.114105	1	1	1
sws2	Cf pineal	0	1	1	1
sws2	Cf tectum	0	1	2	1
sws2	Cf tectum	0	1	2	1
sws2	Cf tel	0	1	3	1
sws2	Cf tel	0	1	3	1
sws2	Cf deep brain	0.226035	1	4	1
sws2	Cf deep brain	0	1	4	1
mws	Sf eye	5.09253	0	0	2
mws	Sf eye	6.43521	0	0	2
mws	Sf pineal	0.0703017	0	1	2
mws	Sf pineal	0.150299	0	1	2
mws	Sf tectum	0.146055	0	2	2
mws	Sf tectum	0	0	2	2
mws	Sf tel	0.128146	0	3	2
mws	Sf tel	0.154797	0	3	2
mws	Sf deep brain	0.175328	0	4	2
mws	Sf deep brain	0.309377	0	4	2
mws	Cf eye	0.0640225	1	0	2
mws	Cf eye	0.179967	1	0	2
mws	Cf pineal	0.0919949	1	1	2
mws	Cf pineal	0.160964	1	1	2
mws	Cf tectum	0.0601263	1	2	2
mws	Cf tectum	0.345499	1	2	2
mws	Cf tel	0.1564	1	3	2
mws	Cf tel	0.17225	1	3	2
mws	Cf deep brain	0.08688	1	4	2
mws	Cf deep brain	0.149245	1	4	2
lws	sf eye	154.194	0	0	3
lws	sf eye	167.292	0	0	3
lws	sf eye	194.504	0	0	3
lws	Sf pineal	27.624	0	1	3
lws	Sf pineal	31.1408	0	1	3
lws	Sf pineal	32.9464	0	1	3
lws	Sf tectum	0.491529	0	2	3
lws	Sf tectum	0.530066	0	2	3
lws	Sf tectum	0.598462	0	2	3
lws	Sf tel	0.172182	0	3	3
lws	Sf tel	0.178994	0	3	3
lws	Sf tel	0	0	3	3
lws	Sf deep brain	0.73837	0	4	3
lws	Sf deep brain	0.819995	0	4	3
lws	Sf deep brain	1	0	4	3
lws	cf eye	0	1	0	3
lws	cf eye	0	1	0	3
lws	cf eye	0	1	0	3
lws	Cf pineal	2.61105	1	1	3
lws	Cf pineal	0	1	1	3
lws	Cf pineal	0	1	1	3
lws	Cf tectum	0	1	2	3
lws	Cf tectum	0	1	2	3
lws	Cf tectum	0	1	2	3
lws	Cf tel	0	1	3	3
lws	Cf tel	0	1	3	3
lws	Cf tel	0	1	3	3
lws	Cf deep brain	0.0209542	1	4	3
lws	Cf deep brain	0.195682	1	4	3
lws	Cf deep brain	0	1	4	3
rhol	Sf eye	1.30441	0	0	4
rhol	Sf eye	1.892	0	0	4
rhol	Sf pineal	0	0	1	4
rhol	Sf pineal	0	0	1	4
rhol	Sf tectum	0	0	2	4
rhol	Sf tectum	0	0	2	4
rhol	Sf tel	0	0	3	4
rhol	Sf tel	0	0	3	4
rhol	Sf deep brain	0	0	4	4
rhol	Sf deep brain	0	0	4	4
rhol	Cf eye	0	1	0	4
rhol	Cf eye	0	1	0	4
rhol	Cf pineal	0	1	1	4
rhol	Cf pineal	0	1	1	4
rhol	Cf tectum	0	1	2	4
rhol	Cf tectum	0	1	2	4
rhol	Cf tel	0	1	3	4
rhol	Cf tel	0	1	3	4
rhol	Cf deep brain	0	1	4	4
rhol	Cf deep brain	0	1	4	4
exo-rod	sf eye	0.38868	0	0	5
exo-rod	sf eye	0.553732	0	0	5
exo-rod	sf eye	0	0	0	5
exo-rod	sf pineal	585.681	0	1	5
exo-rod	sf pineal	607.833	0	1	5
exo-rod	sf pineal	633.403	0	1	5
exo-rod	sf tectum	1.7247	0	2	5
exo-rod	sf tectum	1.88958	0	2	5
exo-rod	sf tectum	2.19552	0	2	5
exo-rod	sf tel	1.48139	0	3	5
exo-rod	sf tel	1.86753	0	3	5
exo-rod	sf tel	2.78038	0	3	5
exo-rod	Sf deep brain	0.0643018	0	4	5
exo-rod	Sf deep brain	0.222626	0	4	5
exo-rod	Sf deep brain	0.307879	0	4	5
exo-rod	Cf eye	0.0563149	1	0	5
exo-rod	Cf eye	0.194286	1	0	5
exo-rod	Cf eye	0.208018	1	0	5
exo-rod	cf pineal	405.75	1	1	5
exo-rod	cf pineal	451.499	1	1	5
exo-rod	cf pineal	473.234	1	1	5
exo-rod	cf tectum	2.32395	1	2	5
exo-rod	cf tectum	2.57633	1	2	5
exo-rod	cf tectum	3.31322	1	2	5
exo-rod	cf tel	1.08862	1	3	5
exo-rod	cf tel	2.27287	1	3	5
exo-rod	cf tel	3.03187	1	3	5
exo-rod	Cf deep brain	0.0908118	1	4	5
exo-rod	Cf deep brain	0	1	4	5
exo-rod	Cf deep brain	0	1	4	5
vaa	Sf eye	1.97678	0	0	6
vaa	Sf eye	2.80592	0	0	6
vaa	Sf pineal	0.325093	0	1	6
vaa	Sf pineal	0	0	1	6
vaa	Sf tectum	5.9187	0	2	6
vaa	Sf tectum	9.96869	0	2	6
vaa	Sf tel	0.0164989	0	3	6
vaa	Sf tel	0.241004	0	3	6
vaa	Sf deep brain	2.59578	0	4	6
vaa	Sf deep brain	3.55052	0	4	6
vaa	Cf eye	0.232144	1	0	6
vaa	Cf eye	1.4208	1	0	6
vaa	Cf pineal	0	1	1	6
vaa	Cf pineal	0	1	1	6
vaa	Cf tectum	0.900175	1	2	6
vaa	Cf tectum	1.46414	1	2	6
vaa	Cf tel	0.125165	1	3	6
vaa	Cf tel	0	1	3	6
vaa	Cf deep brain	1.27651	1	4	6
vaa	Cf deep brain	1.3259	1	4	6
vab	Sf eye	0.334792	0	0	7
vab	Sf eye	0.866127	0	0	7
vab	Sf pineal	0.310846	0	1	7
vab	Sf pineal	0	0	1	7
vab	Sf tectum	0.828123	0	2	7
vab	Sf tectum	0.843937	0	2	7
vab	Sf tel	0	0	3	7
vab	Sf tel	0	0	3	7
vab	Sf deep brain	0.603481	0	4	7
vab	Sf deep brain	0.627726	0	4	7
vab	Cf eye	0	1	0	7
vab	Cf eye	0	1	0	7
vab	Cf pineal	0	1	1	7
vab	Cf pineal	0	1	1	7
vab	Cf tectum	0.416037	1	2	7
vab	Cf tectum	0	1	2	7
vab	Cf tel	0	1	3	7
vab	Cf tel	0	1	3	7
vab	Cf deep brain	0.31822	1	4	7
vab	Cf deep brain	0.333971	1	4	7
parapina	Sf eye	0	0	0	8
parapina	Sf eye	0	0	0	8
parapina	Sf pineal	19.3143	0	1	8
parapina	Sf pineal	25.4274	0	1	8
parapina	Sf tectum	0	0	2	8
parapina	Sf tectum	0	0	2	8
parapina	Sf tel	0.127254	0	3	8
parapina	Sf tel	0	0	3	8
parapina	Sf deep brain	0	0	4	8
parapina	Sf deep brain	0	0	4	8
parapina	Cf eye	0	1	0	8
parapina	Cf eye	0	1	0	8
parapina	Cf pineal	0.966856	1	1	8
parapina	Cf pineal	1.44788	1	1	8
parapina	Cf tectum	0	1	2	8
parapina	Cf tectum	0	1	2	8
parapina	Cf tel	0	1	3	8
parapina	Cf tel	0	1	3	8
parapina	Cf deep brain	0.309249	1	4	8
parapina	Cf deep brain	0	1	4	8
tmt1a	Sf eye	0.284226	0	0	9
tmt1a	Sf eye	0	0	0	9
tmt1a	Sf pineal	0.0515088	0	1	9
tmt1a	Sf pineal	0.293298	0	1	9
tmt1a	Sf tectum	9.6211	0	2	9
tmt1a	Sf tectum	12.752	0	2	9
tmt1a	Sf tel	2.30499	0	3	9
tmt1a	Sf tel	4.11015	0	3	9
tmt1a	Sf deep brain	3.95047	0	4	9
tmt1a	Sf deep brain	5.34239	0	4	9
tmt1a	Cf eye	0.159608	1	0	9
tmt1a	Cf eye	0.244621	1	0	9
tmt1a	Cf pineal	0	1	1	9
tmt1a	Cf pineal	0	1	1	9
tmt1a	Cf tectum	1.34529	1	2	9
tmt1a	Cf tectum	2.1811	1	2	9
tmt1a	Cf tel	1.69725	1	3	9
tmt1a	Cf tel	2.08749	1	3	9
tmt1a	Cf deep brain	3.63039	1	4	9
tmt1a	Cf deep brain	3.88448	1	4	9
tmt1b	Sf eye	0.431177	0	0	10
tmt1b	Sf eye	0	0	0	10
tmt1b	Sf pineal	1.58264	0	1	10
tmt1b	Sf pineal	0	0	1	10
tmt1b	Sf tectum	11.3054	0	2	10
tmt1b	Sf tectum	22.3822	0	2	10
tmt1b	Sf tel	4.70144	0	3	10
tmt1b	Sf tel	6.45868	0	3	10
tmt1b	Sf deep brain	1.89248	0	4	10
tmt1b	Sf deep brain	2.8662	0	4	10
tmt1b	Cf eye	0.296241	1	0	10
tmt1b	Cf eye	0.640734	1	0	10
tmt1b	Cf pineal	0	1	1	10
tmt1b	Cf pineal	0	1	1	10
tmt1b	Cf tectum	5.98635	1	2	10
tmt1b	Cf tectum	19.3459	1	2	10
tmt1b	Cf tel	1.64143	1	3	10
tmt1b	Cf tel	0	1	3	10
tmt1b	Cf deep brain	4.61855	1	4	10
tmt1b	Cf deep brain	10.1098	1	4	10
tmt2a	Sf eye	0.285519	0	0	11
tmt2a	Sf eye	1.22573	0	0	11
tmt2a	Sf pineal	23.3404	0	1	11
tmt2a	Sf pineal	25.4945	0	1	11
tmt2a	Sf tectum	12.4702	0	2	11
tmt2a	Sf tectum	13.8441	0	2	11
tmt2a	Sf tel	1.07201	0	3	11
tmt2a	Sf tel	1.07815	0	3	11
tmt2a	Sf deep brain	1.47753	0	4	11
tmt2a	Sf deep brain	3.31262	0	4	11
tmt2a	Cf eye	7.18852	1	0	11
tmt2a	Cf eye	7.6957	1	0	11
tmt2a	Cf pineal	1.44354	1	1	11
tmt2a	Cf pineal	2.73951	1	1	11
tmt2a	Cf tectum	0.700491	1	2	11
tmt2a	Cf tectum	0.831533	1	2	11
tmt2a	Cf tel	0.623233	1	3	11
tmt2a	Cf tel	0.661691	1	3	11
tmt2a	Cf deep brain	0.146842	1	4	11
tmt2a	Cf deep brain	0.29421	1	4	11
tmt2b	Sf eye	0	0	0	12
tmt2b	Sf eye	0	0	0	12
tmt2b	Sf eye	0	0	0	12
tmt2b	Sf pineal	0.0634976	0	1	12
tmt2b	Sf pineal	0	0	1	12
tmt2b	Sf pineal	0	0	1	12
tmt2b	Sf tectum	0.018926	0	2	12
tmt2b	Sf tectum	0.0273258	0	2	12
tmt2b	Sf tectum	0.0636832	0	2	12
tmt2b	Sf tel	0.0179319	0	3	12
tmt2b	Sf tel	0.122049	0	3	12
tmt2b	Sf tel	0	0	3	12
tmt2b	Sf deep brain	0.187915	0	4	12
tmt2b	Sf deep brain	0	0	4	12
tmt2b	Sf deep brain	0	0	4	12
tmt2b	Cf eye	0.0365473	1	0	12
tmt2b	Cf eye	0.0986485	1	0	12
tmt2b	Cf eye	0.18898	1	0	12
tmt2b	Cf pineal	0	1	1	12
tmt2b	Cf pineal	0	1	1	12
tmt2b	Cf pineal	0	1	1	12
tmt2b	Cf tectum	0.133477	1	2	12
tmt2b	Cf tectum	0	1	2	12
tmt2b	Cf tectum	0	1	2	12
tmt2b	Cf tel	0	1	3	12
tmt2b	Cf tel	0	1	3	12
tmt2b	Cf tel	0	1	3	12
tmt2b	Cf deep brain	0.19778	1	4	12
tmt2b	Cf deep brain	0.20237	1	4	12
tmt2b	Cf deep brain	0.565516	1	4	12
tmt3a	Sf eye	0	0	0	13
tmt3a	Sf eye	0	0	0	13
tmt3a	Sf pineal	0.239245	0	1	13
tmt3a	Sf pineal	0	0	1	13
tmt3a	Sf tectum	1.50392	0	2	13
tmt3a	Sf tectum	1.97	0	2	13
tmt3a	Sf tel	0.173198	0	3	13
tmt3a	Sf tel	0.322751	0	3	13
tmt3a	Sf deep brain	0.509005	0	4	13
tmt3a	Sf deep brain	0.762978	0	4	13
tmt3a	Cf eye	0.225525	1	0	13
tmt3a	Cf eye	0.231442	1	0	13
tmt3a	Cf pineal	0	1	1	13
tmt3a	Cf pineal	0	1	1	13
tmt3a	Cf tectum	0.153815	1	2	13
tmt3a	Cf tectum	0	1	2	13
tmt3a	Cf tel	0	1	3	13
tmt3a	Cf tel	0	1	3	13
tmt3a	Cf deep brain	0.323121	1	4	13
tmt3a	Cf deep brain	0.376782	1	4	13
opn3	Sf eye	0	0	0	14
opn3	Sf eye	0	0	0	14
opn3	Sf pineal	7.22903	0	1	14
opn3	Sf pineal	7.8358	0	1	14
opn3	Sf tectum	14.1348	0	2	14
opn3	Sf tectum	19.2281	0	2	14
opn3	Sf tel	1.95405	0	3	14
opn3	Sf tel	2.17704	0	3	14
opn3	Sf deep brain	3.15801	0	4	14
opn3	Sf deep brain	5.43252	0	4	14
opn3	Cf eye	0.574596	1	0	14
opn3	Cf eye	1.57696	1	0	14
opn3	Cf pineal	1.34555	1	1	14
opn3	Cf pineal	1.8457	1	1	14
opn3	Cf tectum	1.47131	1	2	14
opn3	Cf tectum	2.42287	1	2	14
opn3	Cf tel	0.710494	1	3	14
opn3	Cf tel	1.39661	1	3	14
opn3	Cf deep brain	1.95313	1	4	14
opn3	Cf deep brain	4.01764	1	4	14
opn6a	Sf eye	9.69049	0	0	15
opn6a	Sf eye	12.7529	0	0	15
opn6a	Sf pineal	0.784354	0	1	15
opn6a	Sf pineal	1.21925	0	1	15
opn6a	Sf tectum	0.0289651	0	2	15
opn6a	Sf tectum	0	0	2	15
opn6a	Sf tel	0.302294	0	3	15
opn6a	Sf tel	0.60094	0	3	15
opn6a	Sf deep brain	0.415776	0	4	15
opn6a	Sf deep brain	0	0	4	15
opn6a	Cf eye	0.369498	1	0	15
opn6a	Cf eye	0.416009	1	0	15
opn6a	Cf pineal	0.105565	1	1	15
opn6a	Cf pineal	0.147567	1	1	15
opn6a	Cf tectum	0.353287	1	2	15
opn6a	Cf tectum	0	1	2	15
opn6a	Cf tel	0.391847	1	3	15
opn6a	Cf tel	0	1	3	15
opn6a	Cf deep brain	0.951649	1	4	15
opn6a	Cf deep brain	1.45795	1	4	15
opn6b	sf eye	2.39824	0	0	16
opn6b	sf eye	4.27648	0	0	16
opn6b	sf eye	4.72254	0	0	16
opn6b	Sf pineal	0	0	1	16
opn6b	Sf pineal	0	0	1	16
opn6b	Sf pineal	0	0	1	16
opn6b	Sf tectum	0.0207647	0	2	16
opn6b	Sf tectum	0	0	2	16
opn6b	Sf tectum	0	0	2	16
opn6b	Sf tel	0	0	3	16
opn6b	Sf tel	0	0	3	16
opn6b	Sf tel	0	0	3	16
opn6b	Sf deep brain	0	0	4	16
opn6b	Sf deep brain	0	0	4	16
opn6b	Sf deep brain	0	0	4	16
opn6b	cf eye	0	1	0	16
opn6b	cf eye	0	1	0	16
opn6b	cf eye	0	1	0	16
opn6b	Cf pineal	0	1	1	16
opn6b	Cf pineal	0	1	1	16
opn6b	Cf pineal	0	1	1	16
opn6b	Cf tectum	0	1	2	16
opn6b	Cf tectum	0	1	2	16
opn6b	Cf tectum	0	1	2	16
opn6b	Cf tel	0	1	3	16
opn6b	Cf tel	0	1	3	16
opn6b	Cf tel	0	1	3	16
opn6b	Cf deep brain	0.0258238	1	4	16
opn6b	Cf deep brain	0	1	4	16
opn6b	Cf deep brain	0	1	4	16
opn7d	Sf eye	0.182537	0	0	17
opn7d	Sf eye	0	0	0	17
opn7d	Sf pineal	0	0	1	17
opn7d	Sf pineal	0	0	1	17
opn7d	Sf tectum	5.02106	0	2	17
opn7d	Sf tectum	5.90865	0	2	17
opn7d	Sf tel	0.668644	0	3	17
opn7d	Sf tel	1.18995	0	3	17
opn7d	Sf deep brain	0.956199	0	4	17
opn7d	Sf deep brain	1.50708	0	4	17
opn7d	Cf eye	0.397898	1	0	17
opn7d	Cf eye	0.54465	1	0	17
opn7d	Cf pineal	0	1	1	17
opn7d	Cf pineal	0	1	1	17
opn7d	Cf tectum	0.19352	1	2	17
opn7d	Cf tectum	0.676137	1	2	17
opn7d	Cf tel	1.54047	1	3	17
opn7d	Cf tel	1.83501	1	3	17
opn7d	Cf deep brain	1.60121	1	4	17
opn7d	Cf deep brain	2.28354	1	4	17
opn9	Sf eye	0	0	0	18
opn9	Sf eye	0	0	0	18
opn9	Sf eye	0	0	0	18
opn9	Sf pineal	0.773557	0	1	18
opn9	Sf pineal	1.64996	0	1	18
opn9	Sf pineal	2.02268	0	1	18
opn9	Sf tectum	0.139063	0	2	18
opn9	Sf tectum	0.302383	0	2	18
opn9	Sf tectum	0	0	2	18
opn9	Sf tel	0.762152	0	3	18
opn9	Sf tel	0	0	3	18
opn9	Sf tel	0	0	3	18
opn9	Sf deep brain	0.210121	0	4	18
opn9	Sf deep brain	0	0	4	18
opn9	Sf deep brain	0	0	4	18
opn9	Cf eye	1.54456	1	0	18
opn9	Cf eye	1.80623	1	0	18
opn9	Cf eye	1.88871	1	0	18
opn9	Cf pineal	0	1	1	18
opn9	Cf pineal	0	1	1	18
opn9	Cf pineal	0	1	1	18
opn9	Cf tectum	0	1	2	18
opn9	Cf tectum	0	1	2	18
opn9	Cf tectum	0	1	2	18
opn9	Cf tel	0	1	3	18
opn9	Cf tel	0	1	3	18
opn9	Cf tel	0	1	3	18
opn9	Cf deep brain	0	1	4	18
opn9	Cf deep brain	0	1	4	18
opn9	Cf deep brain	0	1	4	18
rgra	Sf eye	75.4096	0	0	19
rgra	Sf eye	80.3579	0	0	19
rgra	Sf pineal	488.246	0	1	19
rgra	Sf pineal	557.556	0	1	19
rgra	Sf tectum	49.2201	0	2	19
rgra	Sf tectum	50.6443	0	2	19
rgra	Sf tel	73.5831	0	3	19
rgra	Sf tel	82.1891	0	3	19
rgra	Sf deep brain	55.3996	0	4	19
rgra	Sf deep brain	56.7664	0	4	19
rgra	Cf eye	27.6888	1	0	19
rgra	Cf eye	33.7991	1	0	19
rgra	Cf pineal	92.4189	1	1	19
rgra	Cf pineal	93.0043	1	1	19
rgra	Cf tectum	16.2813	1	2	19
rgra	Cf tectum	16.8078	1	2	19
rgra	Cf tel	48.1542	1	3	19
rgra	Cf tel	49.76	1	3	19
rgra	Cf deep brain	38.3864	1	4	19
rgra	Cf deep brain	46.652	1	4	19
rgrb	Sf eye	212.852	0	0	20
rgrb	Sf eye	225.966	0	0	20
rgrb	Sf eye	232.301	0	0	20
rgrb	Sf pineal	189.322	0	1	20
rgrb	Sf pineal	214.41	0	1	20
rgrb	Sf pineal	223.36	0	1	20
rgrb	Sf tectum	5.49253	0	2	20
rgrb	Sf tectum	6.48165	0	2	20
rgrb	Sf tectum	7.12868	0	2	20
rgrb	Sf tel	5.02269	0	3	20
rgrb	Sf tel	6.69878	0	3	20
rgrb	Sf tel	7.58786	0	3	20
rgrb	Sf deep brain	1.59963	0	4	20
rgrb	Sf deep brain	3.2991	0	4	20
rgrb	Sf deep brain	3.59018	0	4	20
rgrb	Cf eye	9.39464	1	0	20
rgrb	Cf eye	10.6383	1	0	20
rgrb	Cf eye	12.5326	1	0	20
rgrb	Cf pineal	37.1158	1	1	20
rgrb	Cf pineal	40.2786	1	1	20
rgrb	Cf pineal	44.3074	1	1	20
rgrb	Cf tectum	5.76184	1	2	20
rgrb	Cf tectum	7.6651	1	2	20
rgrb	Cf tectum	10.3191	1	2	20
rgrb	Cf tel	0.392439	1	3	20
rgrb	Cf tel	2.74171	1	3	20
rgrb	Cf tel	3.22652	1	3	20
rgrb	Cf deep brain	4.31905	1	4	20
rgrb	Cf deep brain	4.35314	1	4	20
rgrb	Cf deep brain	5.45284	1	4	20
opn5	Sf eye	0	0	0	21
opn5	Sf eye	0	0	0	21
opn5	Sf pineal	4.68162	0	1	21
opn5	Sf pineal	5.98411	0	1	21
opn5	Sf tectum	0.377719	0	2	21
opn5	Sf tectum	0.396301	0	2	21
opn5	Sf tectum	0.703831	0	2	21
opn5	Sf tectum	1.33663	0	2	21
opn5	Sf tel	0.129733	0	3	21
opn5	Sf tel	0.15207	0	3	21
opn5	Sf tel	0	0	3	21
opn5	Sf tel	0	0	3	21
opn5	Sf deep brain	0.772053	0	4	21
opn5	Sf deep brain	0	0	4	21
opn5	Cf eye	0.365566	1	0	21
opn5	Cf eye	0.396208	1	0	21
opn5	Cf pineal	0.379445	1	1	21
opn5	Cf pineal	0.568747	1	1	21
opn5	Cf tectum	0.30236	1	2	21
opn5	Cf tectum	0.450904	1	2	21
opn5	Cf tectum	0	1	2	21
opn5	Cf tectum	0	1	2	21
opn5	Cf tel	0	1	3	21
opn5	Cf tel	0	1	3	21
opn5	Cf tel	0	1	3	21
opn5	Cf tel	0	1	3	21
opn5	Cf deep brain	0.261489	1	4	21
opn5	Cf deep brain	0.324219	1	4	21
opn5	Cf deep brain	0	1	4	21
opn5	Cf deep brain	0	1	4	21
rrh	sf eye	3.33752	0	0	22
rrh	sf eye	5.1045	0	0	22
rrh	sf eye	8.44013	0	0	22
rrh	sf pineal	40.7399	0	1	22
rrh	sf pineal	40.9649	0	1	22
rrh	sf pineal	51.1658	0	1	22
rrh	Sf tectum	0.532795	0	2	22
rrh	Sf tectum	0.925782	0	2	22
rrh	Sf tel	0.226417	0	3	22
rrh	Sf tel	0.437219	0	3	22
rrh	Sf deep brain	0.838687	0	4	22
rrh	Sf deep brain	1.3403	0	4	22
rrh	Sf deep brain	1.55104	0	4	22
rrh	Cf eye	0.705986	1	0	22
rrh	Cf eye	0.983382	1	0	22
rrh	Cf eye	1.30638	1	0	22
rrh	cf pineal	7.15548	1	1	22
rrh	cf pineal	15.0897	1	1	22
rrh	cf pineal	0	1	1	22
rrh	Cf tectum	0.245118	1	2	22
rrh	Cf tectum	0.247022	1	2	22
rrh	Cf tel	0.130305	1	3	22
rrh	Cf tel	0	1	3	22
rrh	Cf deep brain	0.20479	1	4	22
rrh	Cf deep brain	0.239908	1	4	22
rrh	Cf deep brain	0.420879	1	4	22
opn4m2	Sf eye	3.19233	0	0	23
opn4m2	Sf eye	5.10632	0	0	23
opn4m2	Sf pineal	0.0601363	0	1	23
opn4m2	Sf pineal	0.204876	0	1	23
opn4m2	Sf tectum	0.0391577	0	2	23
opn4m2	Sf tectum	1.01771	0	2	23
opn4m2	Sf tel	0.332612	0	3	23
opn4m2	Sf tel	0.355084	0	3	23
opn4m2	Sf deep brain	0.402453	0	4	23
opn4m2	Sf deep brain	0.762137	0	4	23
opn4m2	Cf eye	1.05246	1	0	23
opn4m2	Cf eye	2.02621	1	0	23
opn4m2	Cf pineal	0	1	1	23
opn4m2	Cf pineal	0	1	1	23
opn4m2	Cf tectum	0	1	2	23
opn4m2	Cf tectum	0	1	2	23
opn4m2	Cf tel	0	1	3	23
opn4m2	Cf tel	0	1	3	23
opn4m2	Cf deep brain	0.373145	1	4	23
opn4m2	Cf deep brain	0.41126	1	4	23
opn4m3	sf eye	1.18612	0	0	24
opn4m3	sf eye	1.43505	0	0	24
opn4m3	sf eye	1.615	0	0	24
opn4m3	Sf pineal	0.451805	0	1	24
opn4m3	Sf pineal	0.897573	0	1	24
opn4m3	Sf pineal	0	0	1	24
opn4m3	Sf tectum	0.510655	0	2	24
opn4m3	Sf tectum	0.572161	0	2	24
opn4m3	Sf tectum	0.588457	0	2	24
opn4m3	Sf tel	0.214822	0	3	24
opn4m3	Sf tel	0.223923	0	3	24
opn4m3	Sf tel	0.517105	0	3	24
opn4m3	Sf deep brain	0.339055	0	4	24
opn4m3	Sf deep brain	0	0	4	24
opn4m3	Sf deep brain	0	0	4	24
opn4m3	cf eye	0.427274	1	0	24
opn4m3	cf eye	0.582149	1	0	24
opn4m3	cf eye	0	1	0	24
opn4m3	Cf pineal	0	1	1	24
opn4m3	Cf pineal	0	1	1	24
opn4m3	Cf pineal	0	1	1	24
opn4m3	Cf tectum	0	1	2	24
opn4m3	Cf tectum	0	1	2	24
opn4m3	Cf tectum	0	1	2	24
opn4m3	Cf tel	0.332139	1	3	24
opn4m3	Cf tel	0	1	3	24
opn4m3	Cf tel	0	1	3	24
opn4m3	Cf deep brain	0.191004	1	4	24
opn4m3	Cf deep brain	0.560393	1	4	24
opn4m3	Cf deep brain	0	1	4	24
opn4x1	Sf eye	0.210595	0	0	25
opn4x1	Sf eye	0.346899	0	0	25
opn4x1	Sf pineal	4.09552	0	1	25
opn4x1	Sf pineal	6.00339	0	1	25
opn4x1	Sf tectum	0.518051	0	2	25
opn4x1	Sf tectum	0	0	2	25
opn4x1	Sf tel	0	0	3	25
opn4x1	Sf tel	0	0	3	25
opn4x1	Sf deep brain	0.362925	0	4	25
opn4x1	Sf deep brain	0.729891	0	4	25
opn4x1	Cf eye	0.606826	1	0	25
opn4x1	Cf eye	1.51539	1	0	25
opn4x1	Cf pineal	0.36657	1	1	25
opn4x1	Cf pineal	0.384453	1	1	25
opn4x1	Cf tectum	0	1	2	25
opn4x1	Cf tectum	0	1	2	25
opn4x1	Cf tel	0	1	3	25
opn4x1	Cf tel	0	1	3	25
opn4x1	Cf deep brain	0.300918	1	4	25
opn4x1	Cf deep brain	0	1	4	25
